# Supplementary material for: The Agreement Rate between Radiographic Interpretation and Histopathologic Diagnosis of Jaw Lesions
Source: Radiol Res Pract. 2019 Mar 4;2019:4056359. doi: 10.1155/2019/4056359 (PMC6425351; doi:10.1155/2019/4056359)
Supplement: Supplementary Materials — The supplemental material is the data on which the findings of the study are based. I submitted it as supplemental material as per the author instruction. [file 4056359.f1.xlsx]

## Sheet: master
year	case #	file #	pt age	gender	Maxilla or Mandible	location	clinical impresson	histo diagnosis	review histo diagnosis	PA (yes=3, No PA=0)	PAN (2=yes, NO Pan=0)	CT (1=yes CT, No CT=0)	1=CT, pan=2, PA=3	radiographic images	type of radiographic image 1=conventional 2=advanced	number of radiographic images	radiographic diagnosis	histo/radio consistency	consistencynew (yes=1, no=0)	code of pathology		Historeading	Radioreading		code
2014	14001	1099700	34	m	Max	#26,27	fibrous dysplasia/granulation tissue	PEH+ focal sclerosing osteo	viable bone/IFH/granulation tissue	3	2	1	1, 2, 3	CT, pan, PA	2	2	osteoma	com	0	6		1	1	malignancy	1
2014	14002	98479	19	f	Both	#18,48	hypereactive follicle	CEOT	hyperplastic follicle/DC	0	2	1	2, 1	Pan, Ceph	1	2	hyperplastic follicle	yes	1	2		1	1	odontogenic cysts	2
2014	14006	1100101	10	f	Max	left max	max tumor, myxoma, LCH, CGCG	pseudotumor	lymphoma, DLBCL	0	0	0	0	None			soft tissue sinus lesion likely malignantsarcoma/lymphoma/melanoma/scc/sg origin	yes	1	1		1	1	odontogenic tumors		??
2014	14012	98671	23	f	Man	#48	distal to partially impacted #48	DC	inflammed DC	3	2	1	2, 3	Pan, PA	1	2	normal follicle	No	0	2		1	0	periapical cysts&granuloma&scar	4
2014	14014	89203	15	m	Man	#46	periapical granuloma/cyst	periapical granuloma	periapical cyst	3	2	0	2, 3	pan, pa	1	3	RO	No	0	4		1	0	nonodontogenic cyst	5
2014	14016	1003110	43	f	Max	#14,15	periapical granuloma/cyst	periapical granuloma	periapical granuloma/ Root fragment with RCT filling material and periapical granuloma	3	0	0	3	pa	1	1	healed bone	No	0	4		1	0	BFOL	6
2014	14017	1098841	20	m	Man	#38	DC	DC	inflammed DC	0	2	0	2	pan	1	1	hyperplastic follicle	No	0	2		1	0	odontogenic tumors and odontomas	3
2014	14019	1099700	34	m	Max	left max	fibrous dysplasia/granulation tissue	diffuse sclerosing osteomyelitis with proliferative periosteitis	BFOL??/sinus lining	0	2	0	1, 2	CT, pan	2	3	as above	com	0	6		1	1	odontoma		??
2014	14021	1099783	22	f	Man	#45	periapical granuloma/cyst #45	periapical granuloma	periapical granuloma+root tip	3	0	0	3	PA	1	1	PA area cut off but rarefying osteitis	yes	1	4		1	1	aggressive benign bony	7
2014	14024	1100395	24	m	Max	#16	periapical granuloma/cyst #16	periapical granuloma	periapical granuloma	0	2	0	2	Pan	1	1	difficult to interpret on a pan, PA recommended/hanadi: radicular cyst	no	0	4		1	0
2014	14031	1096609	12	m	Man	#43	periapical cyst/granuloma	periapical granuloma	periapical granuloma with foreign body reaction	0	2	0	2	pan	1	1	radicular cyst	no	0	4		1	0
2014	14033	1011034	23	f	Man	#38	DC	inflammed cystic wall	inflammed DC	0	2	0	2	pan	1	1	hyperplastic follicle, DC	yes	1	2		1	1
2014	14040	1089796	29	f	Man	#46	periapical granuloma	periapical granuloma	periapical granuloma with foreign body	0	2	0	2	pan	1	1	RO, scar	yes	1	4		1	1
2014	14042	1032148	42	f	Max	#11	periapical cyst	radicular cyst (inflammed)	periapical cyst	3	0	0	3	pa	1	1	RO	No	0	4		1	0
2014	14047	1101818	9	m	Max	#21	odontoma	complex odontoma	odontoma	3	2	0	2, 3	pan, PA	1	2	odontoma	yes	1	3		1	1
2014	14048	1102462	42	f	Max	#26	periapical granuloma	periapical granuloma	periapical granuloma and root fragment	3	0	0	3	pa	1	1	Ro, scar	yes	1	4		1	1
2014	14049	1096810	42	f	Max	#23	periapical granuloma	periapical granuloma	periapical granuloma with cholesterol granuloma	3	0	0	3	pa	1	1	RO, scar	yes	1	4		1	1
2014	14054	1101395	15	f	Man	#36	periapical cyst/granuloma	radicular cyst	periapical cyst with root fragment	3	2	0	2, 3	pan, pa	1	2	radicular cyst	yes	1	4		1	1
2014	14060	1105209	26	f	Man	distal to #48	Okc, ameloblastoma	keratocystic odontogenic tumor	kot	0	2	0	2	pan	1	2	Benign (KOT, unicystic ameloblastoma	Yes	1	3		1	1
2014	14061	1103887	21	m	Man	#46	periapical cyst/granuloma	radicular cyst	periapical cyst	3	0	0	3	pa	1	1	radicular cyst	Yes	1	4		1	1
2014	14063	1104903	22	f	Man	#36	periapical cyst/granuloma	radicular cyst	periapical cyst	0	2	0	2	pan	1	2	RO	No	0	4		1	0
2013	13094	95007	19	m	Man	distal #38	drug induced/ging fibromatosis/hyperplasia	neurofibroma	hyperplastic follicle	0	2	0	2	pan	1	1	DC, KOT	No	0	2		1	0
2013	13091	1095763	28	m	Max	between #26-28	fibrous dysplasia/fibrooseeous	chronic specific granuloma	fibrooseous lesion/periapical granuloma	0	2	1	1, 2	CT, pan	2	2	not clear but possibly sclerosing osteitis/KOT or any benign	com	0	6	pending CBCT	1	1
2013	13090	98324	66	m	Man	distal#48		plasmacytoma	gingivitis with atypical plasma cells suggestive of plasmacytoma	0	2	0	2	pan	1	1	Inflammation vs malignancy, more imaging recommended	yes	1	1		1	1
2013	13089	1098103	25	m	Man	#34 #35	radicular cyst, ameloblastoma	granulation tissue with inflammation	periapical granuloma	0	2	1	1, 2	CT, pan	2	3	2 KOT	no	0	4		1	0
2013	13086	90023	17	f	Man	#45 area	DC	recurrent DC	DC	0	2	0	2	pan	1	2	DC	Yes	1	2		1	1
2013	13085	98476	36	m	Man	46	KOT	inflammed cyst wall	inflammed odontogenic cyst suggestive of KOT	0	2	0	2	pan	1	3	residual cyst based on pan alone	no	0	3		1	0
2013	13084	97570	38	m	Man	posterior to #38	DC, KOT, ameloblastoma	DC	inflammed DC	0	2	0	2	pan	1	1	DC/KOT/ameloblastoma	yes	1	2		1	1
2013	13082	1097009	48	m	Max	#28	periapical cyst/granuloma, abcess, tumor	granulation tissue	periapical cyst	3	2	0	2, 3	pan, pa	1	3	radicular cyst	yes	1	4		1	1
2013	13081	1097009	48	m	Max	#24	periapical cyst/granuloma, abcess, tumor	granulation tissue	periapical cyst	3	2	0	2, 3	pan, pa	1	2	rarefying osteitis	no	0	4		1	0
2013	13079	93395	70	m	Max	upper right max	kot, dc	inflammed cyst wall	inflammed Dc	0	2	1	1, 2	CT, pan	2	3	Rt sinus opacification, need more imaging	No	0	2	pending CBCT	1	0
2013	13078	1089002	17	f	Max	#16	periapicalgranuloma	periapical granuloma	periapical granuloma	3	3	0	3	pa	1	1	PA area curt but possible rarefying osteitis	yes	1	4		1	1
2013	13076	1054469	76	m	Man	#38 ascending ramus	KOT, Dc, amebloblastoma	DC	GOC	0	2	1	1, 2	CT, pan	2	2	DC/KOT/ameloblastoma	no	0	2	pending CBCT	1	0
2013	13075	1079990	28	m	Max	apical to #21,22	periapical cyst/granuloma	periapical granuloma	periapical granuloma	3	2	1	1, 2, 3	CT, pan, pa	2	4	rarefying osteitis	yes	1	4	pending CBCT	1	1
2013	13072	95901	27	m	Max	max vestibule	KOT	KOT	KOT	0	2	0	2	pan	1	1	amleoblastoma/KOT	yes	1	3		1	1
2013	13071	26274	46	f	Max	upper right incisor area	nasolabial cyst/KOT	cyst	nasopalatine (in bone? Soft tissue)	0	2	0	2	pan	1	1	imaging inadequate	com	0	5		1	1
2013	13066	95224	31	m	Max	palate	periapical cyst	inflammed cyst wall	periapical granuloma	3	2	0	2, 3	pan, pa	1	3	radicular cust	no	0	4		1	0
2013	13063	91976	24	m	Max	periapical #11, 12	periapical cyst, OKC, ameloblastoma	radicular cyst	radicular cyst	0	2	0	2	pan	1	1	RO, Radicular Cyst	yes	1	4		1	1
2013	13057	78593	32	m	Man	rt mand ridge	KOT	DC wall	DC	0	2	0	2	pan1	1	2	DC, KOT	yes	1	2		1	1
2013	13053	93771	8	f		premolar (R&L)	DC, KOT, bifurcatiopn	inflammed cyst wall	inflmaed radicular cyst +fragments of surface epi	0	2	0	2	pan	1	1	buccal bifurcation cyst	com	0	5		1	1
2013	13050	93395	72	m	Max	rt max sinus	DC, mucous retention cyst	inflammed KOT	granulation tissue and sinus lining/ inflammed KOT	0	2	1	1, 2	CT, pan	2	1	not clear	com	0	3		1	1
2013	13048	90814	24	m	Man	left retromolar	DC	inflammed DC	inflammed DC	0	2	0	2	pan	1	2	KOT, Unicystic ameloblastoma	No	0	2		1	0
2013	13047	89680	19	f	Man	#47	periapical granuloma/cyst/abcess	radicular cyst	periapical granuloma	0	2	0	2	pan	1	1	radicular	no	0	4		1	0
2013	13037	92484	34	m	Man	anterior mandible	KOT	periapical granuloma	periapical granuloma	3	2	0	2, 3	pan, pa	1	2	SBC	No	0	4		1	0
2013	13034	92948	36	f	Man	right mandible	kot, ameloblastoma	odontogenic cyst	odontogenic cyst suggestive DC	3	2	0	2, 3	pan, pa	1	3	imaging of poor quality-possible healing SBC	com	0	2		1	1
2013	13032	1086476	32	f	Man	between # 45,46	simple bone cyst	traumatic neuroma	osteoporotic bone marrow defect or simple bone cyst	3	2	0	2, 3	pan, pa	2	1	KOT/simple bone cys.t 1 year after images after treatment?	yes	1	5		1	1
2013	13030	1090839	54	f	Max	#11	periapical granuloma/cyst	periapical granuloma	periapical granuloma	3	2	0	2, 3	pan, pa	1	1	rarefying osteitis/healing/scar	yes	1	4		1	1
2013	13026	1077627	10	f	Man	lower anterior	odontoma	compound odontoma	odontoma	3	2	0	2, 3	Pan, PA	1	2	odontoma	yes	1	3		1	1
2013	13023	85141	41	m	Max	area of #12,13	radicular cyst, residual cyst	radicular cyst (residual type)	periapical cyst	3	2	0	2, 3	pan, pa	1	3	RO	No	0	4		1	0
2013	13019	91784	23	m	Man	left angle og man	kot, ameloblastoma	kot	kot	0	2	0	2	pan	1	1	KOT	Yes	1	3		1	1
2013	13018	1090614	23	f	Man	#47,48	periapical granuloma/cyst	radicular cyst	periapical cyst	0	2	0	2	pan	1	1	radicular cyst	yes	1	4		1	1
2013	13016	73433	52	f	Max	#15	periapical granuloma/cyst/abcess	granuloma	granulation tissue with abcesses	0	2	0	2	pan	1	2	healing radicular cyst	No	0	4		1	0
2013	13015	1003225	45	f	Max	left maxilla	residual cyst	maxillary cyst	sinus lining and glands (surgical ciliated cyst)	0	2	1	1, 2	CT, pan	2	1	residual cyst	no	0	5	pending CBCT	1	0
2013	13014	68264	45	f	Man	lower anterior	traumatic bone cyst, periapical cyst, fibrooseeous lesion	traumatic bone cyst	traumatic bone cyst	3	2	0	2, 3	pan, pa	1	4	SBC	Yes	1	5		1	1
2013	13012	alnoor		f	Man	lower right mandible	ameloblastoma	traumatic bone cyst with BFOL		0	0	0	0	None			space occupying, amelo??	no	0	6		1	0
2013	13009	84658	23	f	Max	between max lateral and canine	nasolabial duct cyst/radicular/kot	radicular cyst	periapical cyst	0	2	0	2	pan	1	1	KOT, radicular	Yes	1	4		1	1
2013	13008	663867		m	Man	right mandible	ameloblastoma/kot/myxoma	ameloblastoma	ameloblastoma with cystic changes	0	1	1	1	CT	2	1	benign tumor (amelo/KOT)SBC	yes	1	3		1	1
2013	13005	alnoor	16	m			odontogenic cyst/tumor	DC	DC(no slide)	0	0	0	0	None			Dc with mesiodese	yes	1	2		1	1
2013	13003	1090778	30	f	Max	#11	granuloma/cyst	periapical granuloma	periapical scar	0	2	0	2	pan	1	1	RO	Yes	1	4		1	1
2013	13002	1090690	51	f	Man	#47	periapical granuloma	periapical granuloma	periapical granuloma	0	2	0	2	pan	1	1	RO	Yes	1	4		1	1
2013	13001	90023	17	f	Man	#85&#45	ameloblastoma/kot	inflammed DC	granulation tissue/inflammed DC	0	2	0	2	pan	1	2	DC	Yes	1	2		1	1
2012	062-12	85076	13	m	Man	beteen #46,47	odontoma	tooth-like structure	tooth-like structure (gross)	0	2	0	2	pan	1	1	dense bone island/complex odontoma	yes	1	3		1	1
2012	061-12	90070	47	f	Man	right posterior mandible	pinborg/myoma	CEOT (pinborg)	CEOT	0	1	1	1	CT	2	1	ossifying fibroma	no	0	3		1	0
2012	060-12	87493	13	m	Man	apical #85	compound odontoma	odontoma	odontoma (gross)	0	2	1	2, 1	Pan, Ceph	1	2	odontoma	yes	1	3		1	1
2012	059-12	1086046	12	f	Man	periapical #36	periapical granuloma/cyst	periapical granuloma	periapical granuloma with microabcesses and foreign body	0	2	0	2	pan	1	1	RO	yes	1	4		1	1
2012	055-12	77094	26	f	Man	distal #48	enlarged follicle	follicle or DC	DC+ salivary gland lobules	0	2	0	2	Pan	1	1	Hyperplastic follicle	no	0	2		1	0
2012	054-12	25642	46	m	Max	#11	granulation tissue/cyst	acute and chronic inglammation+foreign	periapical granuloma with foreign material	3	2	0	2, 3	Pan, PA	1	2	RO	yes	1	4		1	1
2012	051-12	78857	56	f	Max	#22	periapical granuloma/cyst	periapical cyst	periapical cyst with foreign material	3	3	0	3	pa	1	1	possible rarefing osteitis	no	0	4		1	0
2012	050-12	85811	18	f	Man	#46	periapical granuloma/cyst/abcess	periapical abcess with granulation tissue	periapical granuloma with microabcess	3	2	0	2, 3	Pan, PA	1	2	RO	yes	1	4		1	1
2012	048-12	1088530	32	f	Man	#47	periapical granuloma/cyst / abcess	infected periapical granuloma	periapical granuloma with surafce epithelium	3	3	0	3	pa	1	1	rarefying osteitis/hanadi cyst	yes	1	4		1	1
2012	047-12	88618	8	f	Man	#34,35	Dc	inflammed Dc	inflammed DC	0	2	0	2	Pan	1	1	DC	yes	1	2		1	1
2012	046-12	1039423	57	f	Max	#26	periapical granuloma	periapical granuloma	periapical granuloma	0	2	0	2	Pan	1	1	dificult to evaluate?? Endo said granuloma	com	0	4		1	1
2012	043-12	88001	21	f	Max	palatal #11,12,21,22	palatal cyst	inflamme dodontogenic cyst wall	inflammed odontogenic cystic wall	3	2	0	2, 3	Pan, PA	1	2	KOT, nasopalatine	com	0	2		1	1
2012	039-12	75311	19	m	Max	right max sinus	max sinus tissue, mucocele	nasal polyp	inflammatory sinonasal polyp	0	2	0	2	pan	1	1	not clear	com	0	5		1	1
2012	033-12	82161	53	m	Max	Rt upper non healing extraction socket	granulation tissue, SCC	insufficient	fibrosis and chronic inflammation with sinus lining	0	2	0	2	Pan	1	1	malignancy/inflammatory	yes	1	4		1	1
2012	031-12	80010	22	m	Max	apex of #11,21	periapical granuloma	periapical granuloma	periapical scar	0	2	0	2	Pan	1	1	imaging not adequate	com	0	4		1	1
2012	029-12	69351	28	m	Max	apex #21	periapical granuloma	periapical granuloma	periapical granuloma with forein body	3	3	0	3	pa	1	1	rarefying osteitis with RCT filling material/ scar	yes	1	4		1	1
2012	027-12	29541	64	f	Max	#13	periapical granuloma	periapical cyst	periapical cyst	3	2	0	2, 3	Pan, PA	1	2	radicular cyst	yes	1	4		1	1
2012	025-12	608158	23	f	Man	retromolar	radicular cyst	fibrous histiocytoma	scar tissue and focal foreign body reaction and hyaline ring granuloma	0	1	1	1	CT	2	1	malignancy	no	0	4		1	0
2012	024-12	1037550	16	f	Max	apex #15	periapical cyst	periapical granuloma	periapical cyst	0	2	0	2	pan	1	1	lateral radicular/ periodontal cyst	yes	1	4		1	1
2012	021-12	1050577	15	f	Max	top of #28	odontoma	odontoameloblastoma	follicular tissue with ameloplastic like proliferation+odontoma	0	2	0	2	pan	1	2	AFO	no	0	3		1	0
2012	020-12	79126	43	f	Man	#41,42	periapical granuloma	periapical granuloma	periapical granuloma+foreign body reaction	0	2	0	2	pan	1	1	rarefying osteitis	yes	1	4		1	1
2012	019-12	1076190	52	f	Man	lower left side	condensing osteitis	complex odontoma	fragments of viable bone	0	2	0	2	pan	1	1	dense bone isalnd	com	0			1	1
2012	018-12	78926	11	m	Man	#36 area	ODONTOMA	complex odontoma	complex odontoma vs decidious tooth	0	2	0	2	Pan	1	1	AFO	no	0	3		1	0
2012	017-12	84818	47	m	Max	#15,16 apex	apical periodontal cyst	inflammatory periodontal cyst	periapical cyst+root fragment	0	2	0	2	Pan	1	1	RO	no	0	4		1	0
2012	005-12	76453	39	f	Max	#22 apex	granulation tissue	periapical granuloma	periapical granuloma	3	2	0	2, 3	Pan, PA	1	2	RO	yes	1	4		1	1
2012	003-12	79116	26	f	Max	#24,25	periapical cyst	granulation tissue with fistula	scar with small fragment of periapical granuloma								KOT/ radicular	no	0	4		1	0
2011	64-11	1037211	22	f	Man	impacted #38	DC	salivary gland lobules, does not belong here	mucous salivary gland lobules with focal chronic inflammation and myxoid fibrous tissue (correlation with radiograph, stafne defect)	0	2	0	2	pan	1	1		com	0	2		1	1
2011	60-11	1079121	42	m	Max	area of extractio #25,26,27,28		giant cell lesion	central giant cell granuloma	0	2	0	2	pan	1	1		com	0	7		1	1
2011	59-11	78754	9	m	Man	above #34 area	odontoma	compound odontoma	gross odontoma, odontogenic epitheliumc lining c/w DC	3	2	0	2, 3	pan, pa	1	2	compound odontoma	yes	1	3		1	1			Gwet's AC2
2011	54-11	76733	12	m	Man	lower mandible between #33,43	DC,ameloblastoma	mural ameloblastoma	ameloblastoma, plexiform	0	2	1	1, 2	CT, pan	2	1		yes	1	3		1	1
2011	52-11	77269	13	f	Man	#36	periapocal cyst	inflammatory periodontal cyst	periapical cyst	0	2	0	2	pan	1	1		yes	1	4		1	1			Alpha	0.05
2011	50-11	77217	43	f	Man	lower mandible between #33,45	ameloblastoma, DC	unicystic ameloblastoma	A) fragment of unicystic ameloblastoma B) Dc??Ameloblastoma, unicystic	0	2	1	2, 1	pan, CT	2	1		yes	1	3	twice	1	1			Subj Factor	0
2011	39-11	76733	54	m	Man	anterior mandible	CGCG, ameloblastoma	DC	inflammed odontogenic cyst most consistent with periapical cyst	0	2	0	2	Pan	1	1	DC	no	0	4		1	0
2011	37-11	723814	29	f	Max	#17	periapical cyst, DC	inflammatory periodontal cyst	periapical cyst					Check File number			radicular cyst or retention pseudocyst	yes	1	4	??	1	1			#VALUE!	#VALUE!
2011	36-11	76453	49	f	Max	#22 periapical	cholesterol cyst, pus during clinical apicoectomy	periapical abcess with granulation tissue	granulation tissue, microabcesses, foreign body reaction	0	2	0	2	pan	1	1	radicular cyst	no	0	4	pending CBCT	1	0			#VALUE!	#VALUE!
2011	35-11	76733	12	m	Man	impacted #44,34	DC, ameloblastoma	insufficient for diagnosis	DC	0	1	1	1	CT	2	1		com	0	2		1	1			#VALUE!	#VALUE!
2011	34-11	76448	27	m	Man	impacted #48	DC, KOT	inflammed DC	inflammed DC	0	2	0	2	pan	1	1	not clear	com	0	2		1	1			#VALUE!	#VALUE!
2011	31-11	17092	30	m	Max	#26	radicular cyst	inflammatory periodontal cyst	odontogenic cyst with GOC features	3	2	0	2, 3	Pan, PA	1	2	odontogenic cyst likely radicular	yes	1	2	??	1	1
2011	24-11	718423	4	m	Man	destructive manible mass from midline to angle and up to ramus	desmoplastic fibroma, sarcoma, locally aggressive bony mass		myofibroma/myofibroma/ SFT/Nodular fascitis	0	1	1	1	CT	2	1		no	0	7		1	0
2011	17-11	73083	42	f	Man	#41, 31	radicular cyst	radicular cyst	periapical cyst	0	2	0	2	pan	1	1	RO	no	0	4		1	0
2011	16-11	715712	48	f	Man	distal to impacted #38 extends to ramus	radicular, primorial	DC	GOC (DC?)	0	1	1	1	CT	2	1		com	0	2		1	1
2011	13-11	718423	4	m	Man	left mandible, very large, extends to max ?	fibrosarc, burkits, osteosarc	spindle cell proliferation	myofibroma	0	1	1	1	CT	2	2		no	0	7	hos	1	0
2011	02--11	1074520	26	f	Max	left max impacted premolar	odontoameloblastic fibroodontoma	COC (gorlin cyst)	COC/CCOT	0	2	0	2	pan	1	1	DC	no	0	2		1	0
																		sum	51
																			104
																			49.0385
